# Supplementary material
Source: PubMed Central journal article supplement (PMC5409878)
Supplement: NIHMS820543-supplement.pdf [file NIHMS820543-supplement.pdf]

**Table S1: Association of uromodulin/ urine creatinine with risk of composite UTI events**

|                         | Quartile 1<br><=1.06 | Quartile 2<br>>1.06-2.89 | Quartile 3<br>>2.89-5.93 | Quartile 4<br>>5.93 | per unit higher<br>uUMOD/urine<br>creatinine |
|-------------------------|----------------------|--------------------------|--------------------------|---------------------|----------------------------------------------|
| N events                | 91                   | 135                      | 117                      | 75                  |                                              |
| Model 1<br>IRR (95% CI) | 1.00 (ref)           | 1.08 (0.63,1.84)         | 0.89 (0.50,1.57)         | 0.49 (0.29,0.81)    | 0.96 (0.92,0.992)                            |
| Model 2<br>IRR (95% CI) | 1.00 (ref)           | 1.06 (0.59,1.91)         | 0.79 (0.46,1.35)         | 0.51 (0.31,0.87)    | 0.96 (0.93,0.994)                            |
| Model 3<br>IRR (95% CI) | 1.00 (ref)           | 1.06 (0.59,1.90)         | 0.81 (0.46,1.41)         | 0.52 (0.30,0.90)    | 0.96 (0.93,0.996)                            |

Model 1: Unadjusted

Model 2: Age, race, sex

Model 3: Age, race, sex, body mass index, diabetes, estimated glomerular filtration rate and urine albumin
